# Supplementary material for: Assessment of metrics in next-generation sequencing experiments for use in core-genome multilocus sequence type
Source: PeerJ journal article supplement (doi:10.7717/peerj.11842), 2021-08-19
Supplement: FigureS1.pdf [file FigureS1.pdf]

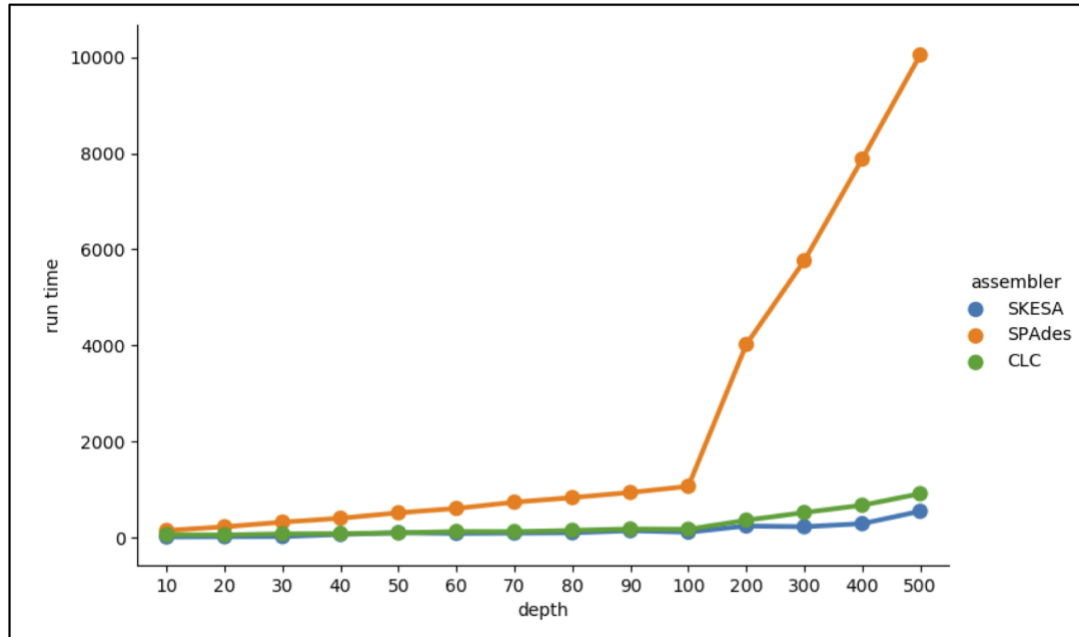

**Figure S1. The estimation of the minimum read coverage for the running time of SPAdes, CLC, and SKESA assemblers.** Comparison of different read lengths for the assembling running time according to different simulated read coverages among SPAdes, CLC, and SKESA for *S. enterica* LT2.
