# Supplementary material for: Assessment of metrics in next-generation sequencing experiments for use in core-genome multilocus sequence type
Source: PeerJ journal article supplement (doi:10.7717/peerj.11842), 2021-08-19
Supplement: FigureS2.pdf [file FigureS2.pdf]

# (A) *S. enterica*

## SRR5866640 (150bp)

### Per sequence quality scores

### Sequence Length Distribution

Read 1

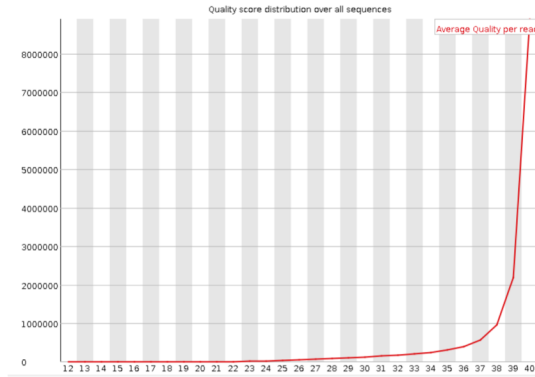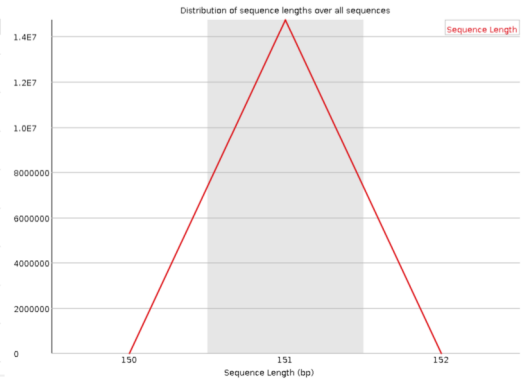

Read 2

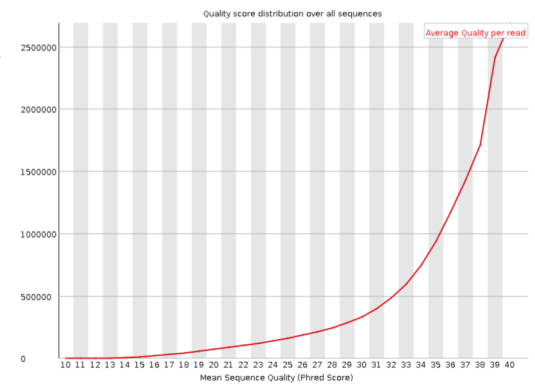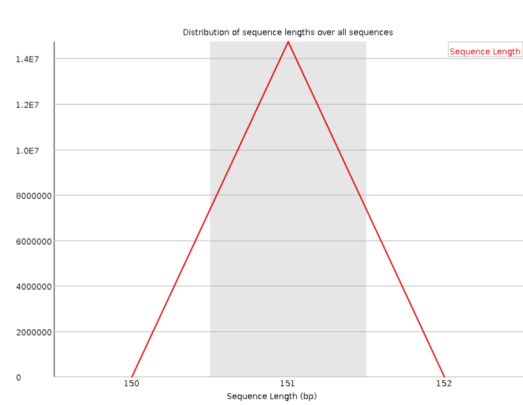

## SRR6929558 (250bp)

Read 1

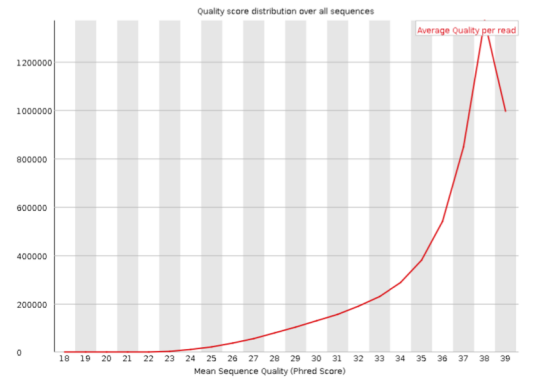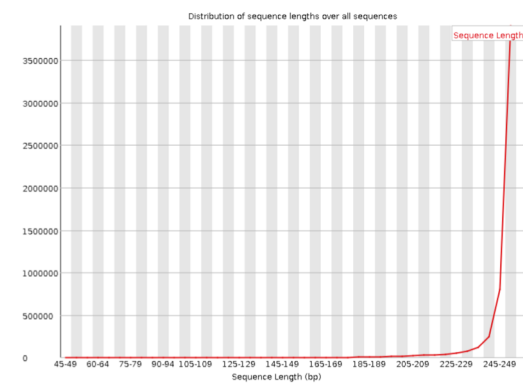

Read 2

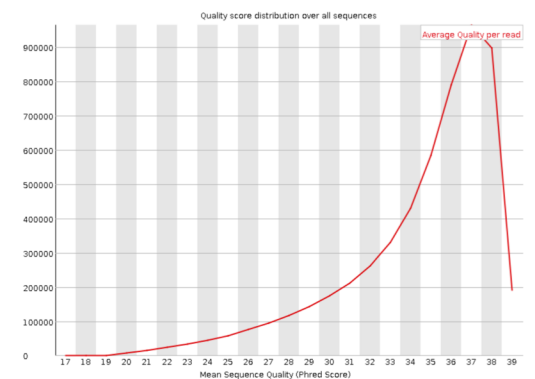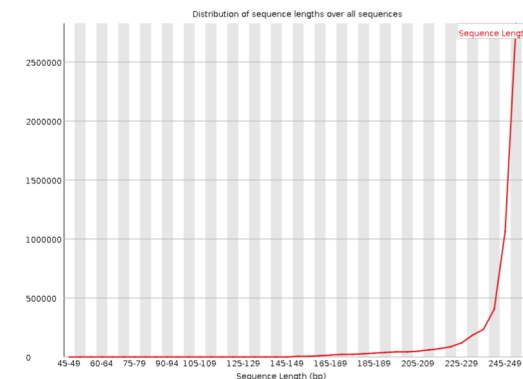

# (B) *E. coli*

## SRR6924239 (150bp)

### Per sequence quality scores

Read 1

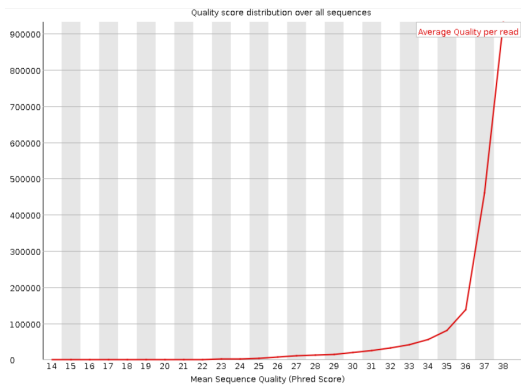

### Sequence Length Distribution

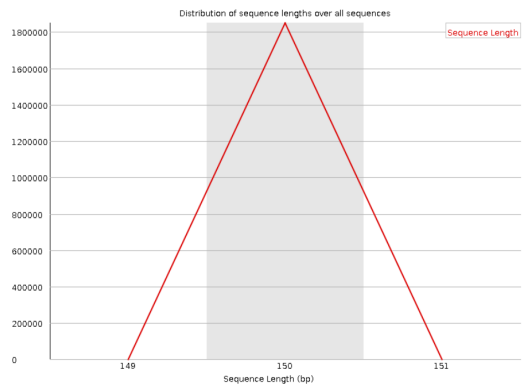

Read 2

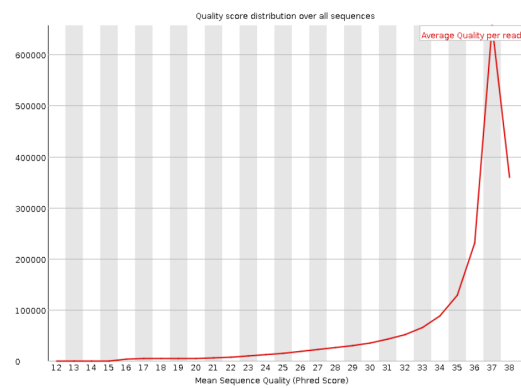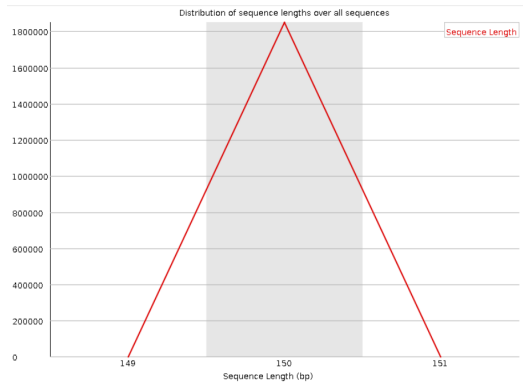

## SRR3205757 (250bp)

Read 1

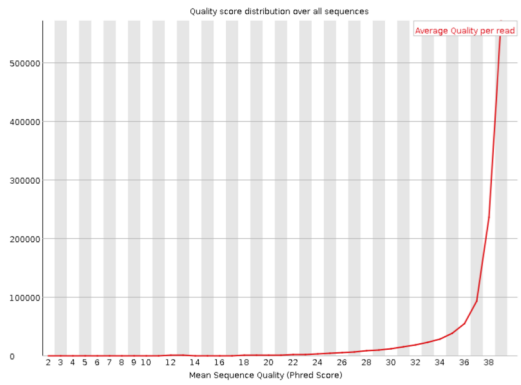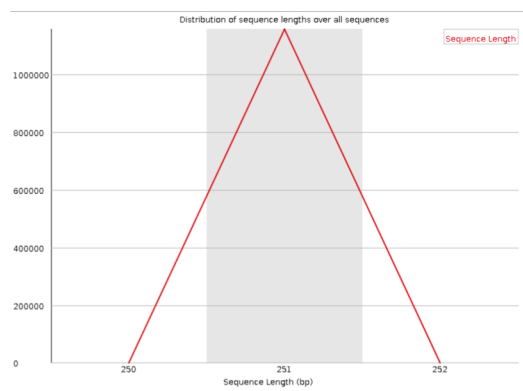

Read 2

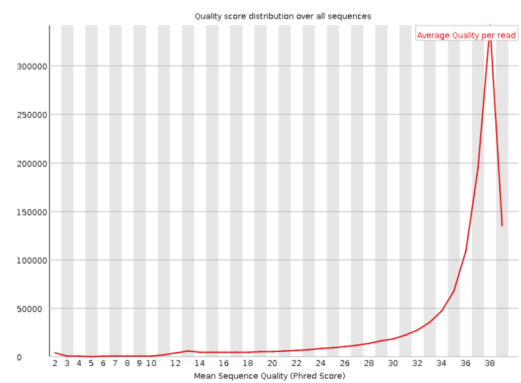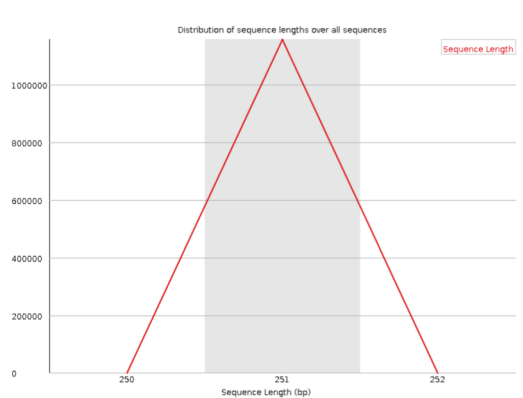

# (C) *L. monocytogenes*

## SRR3089759 (150bp)

### Per sequence quality scores

### Sequence Length Distribution

Read 1

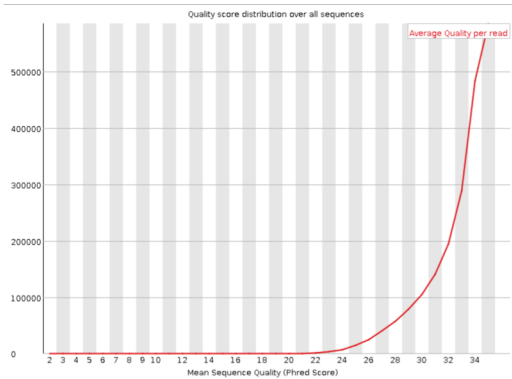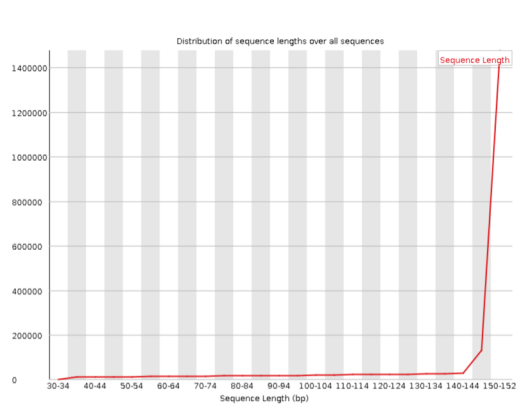

Read 2

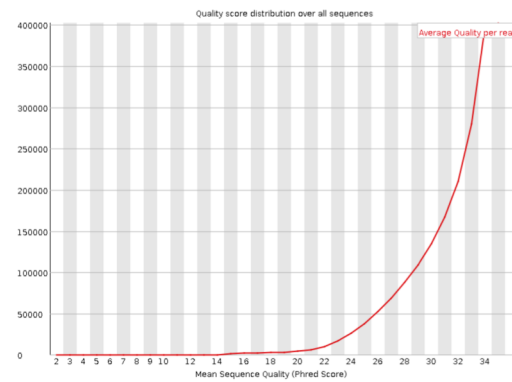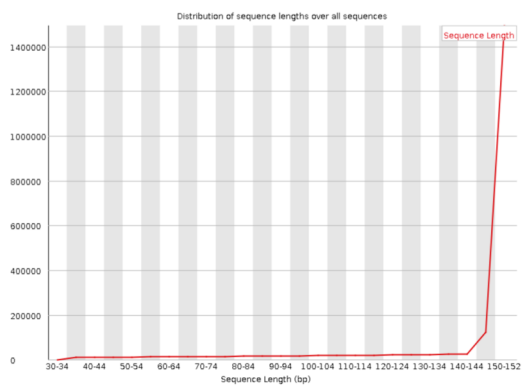

## SRR6347431 (250bp)

Read 1

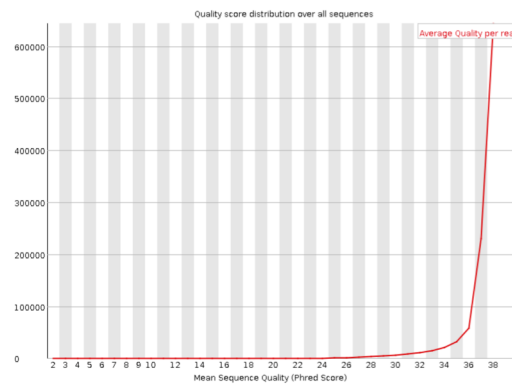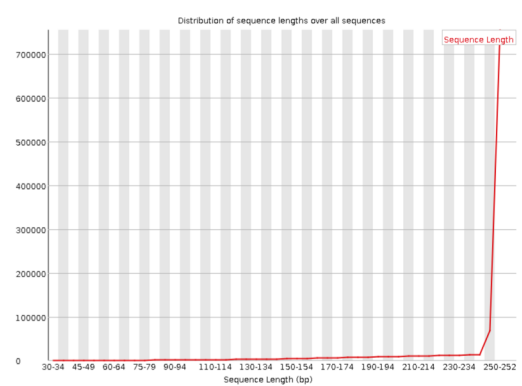

Read 2

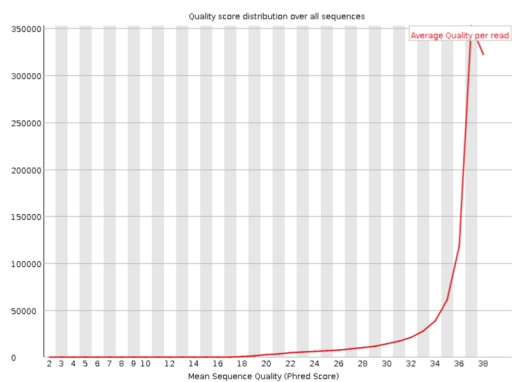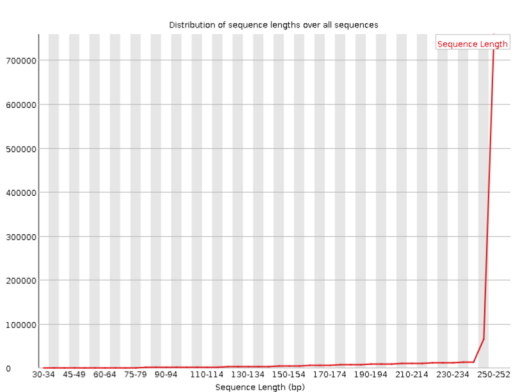

**Figure S2. The real sequenced reads QC performed by using FastQC.** The “Per sequence quality scores” and “Sequence Length Distribution” from QC reports of (A) *S. enterica* (SRR5866640 for 150 bp and SRR6929558 for 250 bp), (B) *E. coli* (SRR6924239 for 150 bp and SRR3205757 for 250 bp), and (C) *L. monocytogenes* (SRR3089759 for 150 bp and SRR6347431 for 250 bp) were shown.
