# Supplementary material for: Assessment of metrics in next-generation sequencing experiments for use in core-genome multilocus sequence type
Source: PubMed Central journal article supplement (PMC8380430; doi:10.7717/peerj.11842), 2021-08-19
Supplement: peerj-09-11842-s004.pdf [file peerj-09-11842-s004.pdf]

**Table S2. The annotation of unrecalled core genes at depth 100×.**

| <i>S. enterica</i>                                     | <i>E. coli</i>                              | <i>L. monocytogens</i>              |
|--------------------------------------------------------|---------------------------------------------|-------------------------------------|
| Anaerobic dimethyl sulfoxide reductase chain B         | Cellulose biosynthesis protein BcsG         | IS3 family transposase ISLmo1       |
| Anaerobic dimethyl sulfoxide reductase chain C         | Cysteine--tRNA ligase                       | hypothetical protein                |
| Biotin carboxylase                                     | D-serine dehydratase                        | Internalin A                        |
| Glycine betaine uptake system ATP-binding protein YehX | DNA translocase FtsK                        | Iron-sulfur cluster carrier protein |
| hypothetical protein                                   | Heat shock protein HslJ                     |                                     |
| Multidrug resistance protein MdtB                      | HTH-type transcriptional regulator CueR     |                                     |
| Multidrug resistance protein MdtC                      | Multidrug efflux pump subunit AcrB          |                                     |
| Oxaloacetate decarboxylase beta chain                  | Small toxic polypeptide LdrD                |                                     |
| putative cyclic di-GMP phosphodiesterase PdeC          | tRNA (guanosine(18)-2'-O)-methyltransferase |                                     |
| Ribonuclease G                                         |                                             |                                     |
| Ribosomal protein L11 methyltransferase                |                                             |                                     |
| tRNA (cytidine(34)-2'-O)-methyltransferase             |                                             |                                     |
